# Supplementary material
Source: MDPI journal article supplement (https://www.mdpi.com/2624-845X/2/1/3)
Supplement: s1 [file s1]

Supplementary Materials

Tailoring the Radionuclide Encapsulation and Surface Chemistry of  $\text{La}(^{223}\text{Ra})\text{VO}_4$  Nanoparticles for Targeted Alpha Therapy

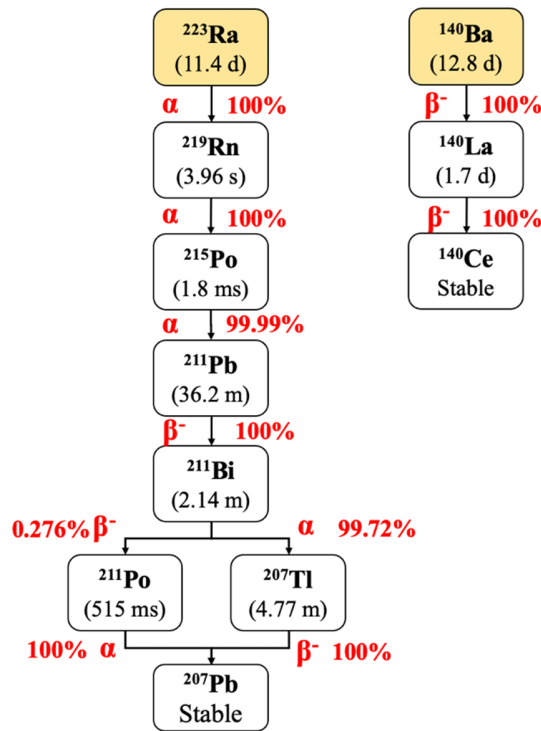

Figure S1. Decay schemes of  $^{223}\text{Ra}$  and  $^{140}\text{Ba}$ .

Table S1. Summary of  $\gamma$ -ray energies and intensities used to calculate the activity of each radionuclide [1].

| Radionuclide      | $\gamma$ -ray energy (keV) | Intensity (%) |
|-------------------|----------------------------|---------------|
| $^{223}\text{Ra}$ | 144.23                     | 3.27          |
|                   | 154.08                     | 5.70          |
|                   | 269.46                     | 13.90         |
| $^{211}\text{Pb}$ | 404.85                     | 3.78          |
|                   | 832.01                     | 3.52          |
| $^{211}\text{Bi}$ | 351.07                     | 13.02         |
| $^{140}\text{Ba}$ | 162.66                     | 6.22          |
|                   | 304.85                     | 4.29          |
|                   | 537.26                     | 24.39         |
| $^{140}\text{La}$ | 328.76                     | 20.30         |
|                   | 487.02                     | 45.50         |
|                   | 815.77                     | 23.28         |

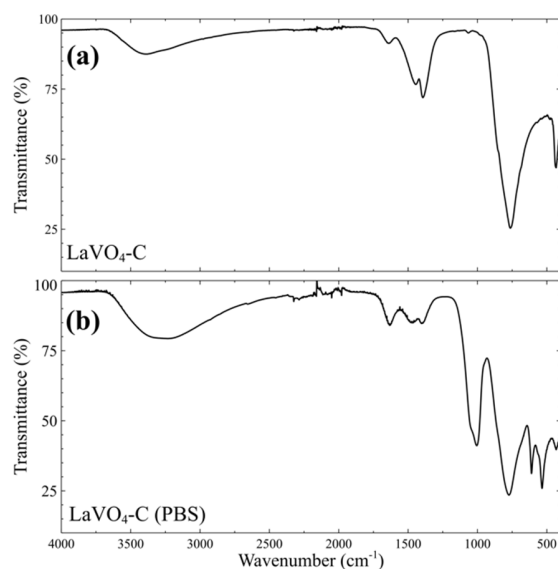

**Figure S2.** Dispersion of LaVO<sub>4</sub> NPs in phosphate-buffered saline (PBS; 1X, pH = 7.4) results in the addition of phosphate groups on the particle surface. FTIR spectra of LaVO<sub>4</sub> NPs synthesized following procedure C (a) before and (b) after dispersion in PBS.

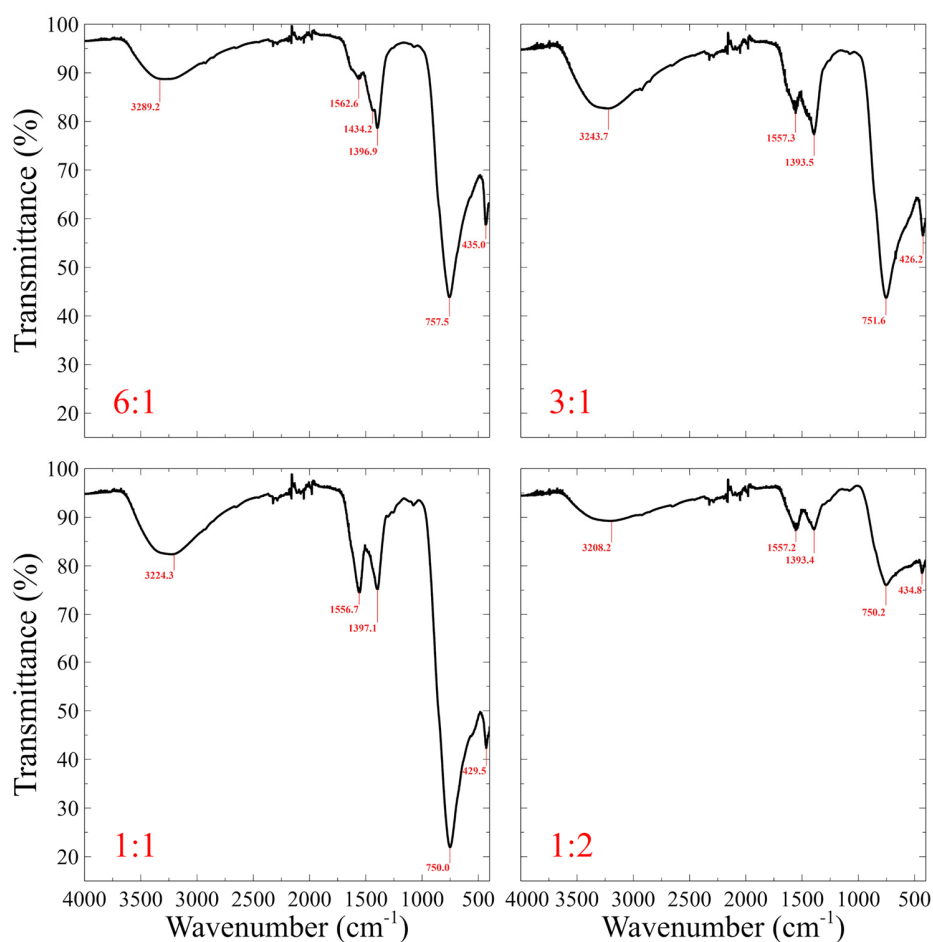

**Figure S3.** Increase molar fraction of NH<sub>4</sub>-Cit results in the appearance of the carboxylate bidentate bond stretching band at ~1,560 cm<sup>-1</sup>, where a 1:1 LaVO<sub>4</sub>:NH<sub>4</sub>-Cit molar ratio exhibits the highest transmittance for the carboxylate bidentate bond stretching band. FTIR spectra of LaVO<sub>4</sub> NPs modified with NH<sub>4</sub>-Cit at different LaVO<sub>4</sub>:NH<sub>4</sub>-Cit molar ratios.

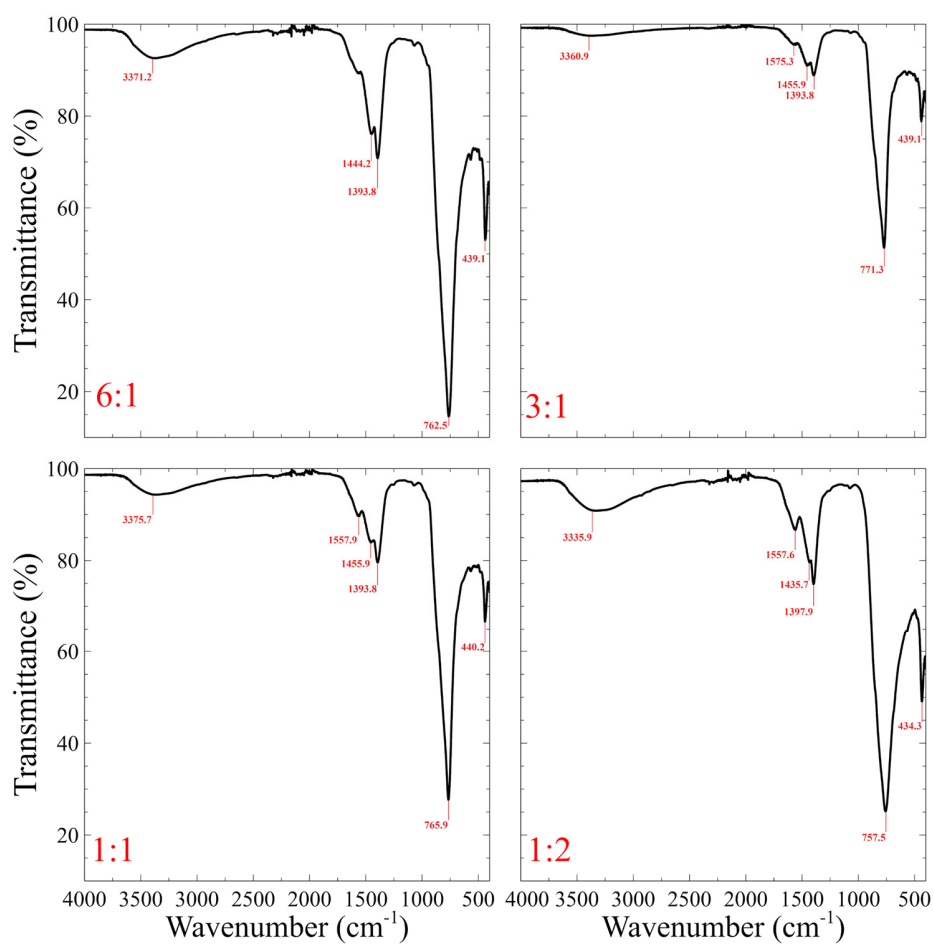

**Figure S4.** Carboxylate bidentate bond stretching band at  $\sim 1,560\text{ cm}^{-1}$  is evidenced at LaVO<sub>4</sub>:Na-Cit molar ratios greater than 1:1. FTIR spectra of LaVO<sub>4</sub> NPs modified with Na-Cit at different LaVO<sub>4</sub>:Na-Cit molar ratios.

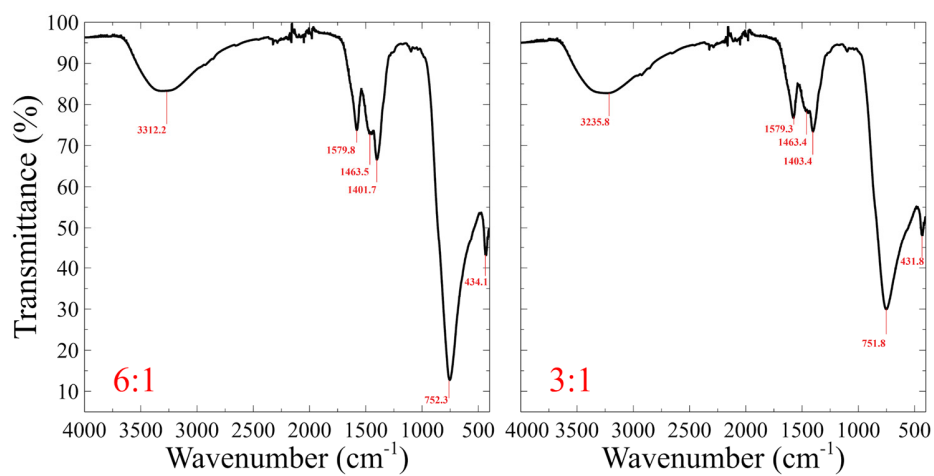

**Figure S5.** Surface modification with EDTA is evidenced by the carboxylate bidentate bond stretching band  $\sim 1,580\text{ cm}^{-1}$ . A shift of the carboxylate bidentate bond stretching relative to  $\text{NH}_4\text{-Cit}$  and  $\text{Na-Cit}$  suggest differences in the coordination of the carboxylate groups around the La cation. FTIR spectra of  $\text{LaVO}_4$  NPs modified with EDTA at different  $\text{LaVO}_4\text{:EDTA}$  molar ratios.

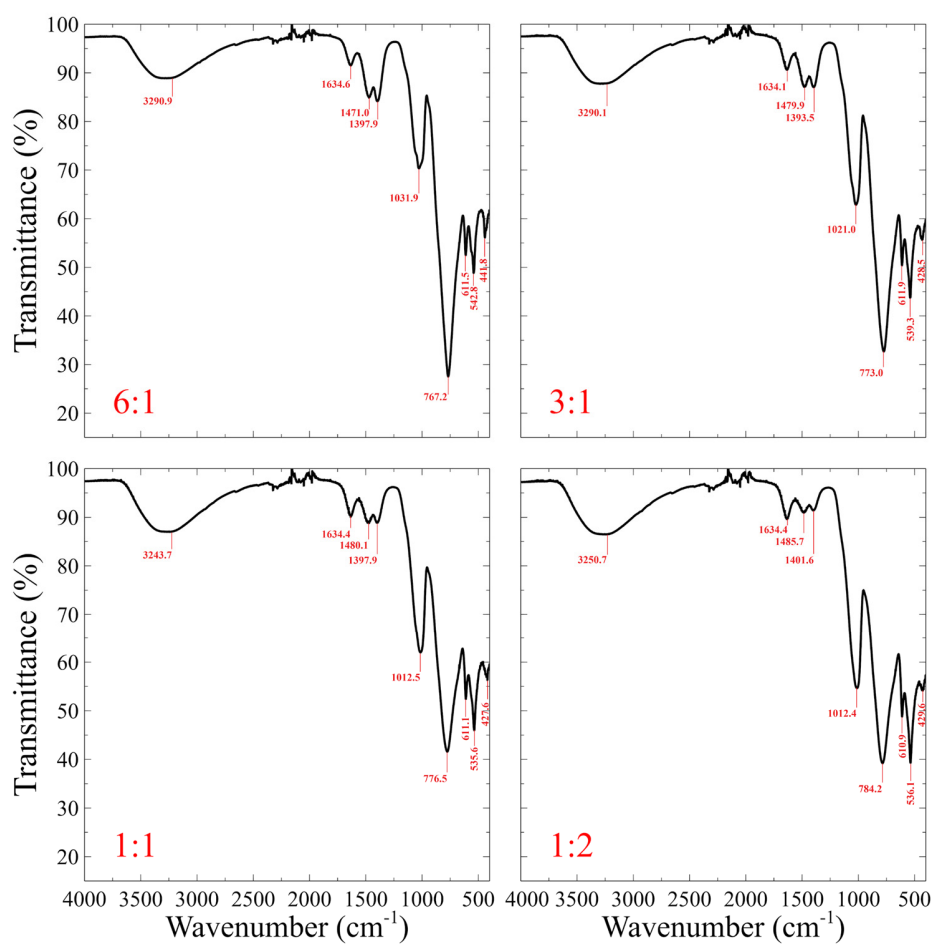

**Figure S6.** LaVO<sub>4</sub> NPs modified with TPP exhibited characteristic phosphate vibration bands at LaVO<sub>4</sub>:TPP molar ratios as low as 1:6. FTIR spectra of LaVO<sub>4</sub> NPs modified with TPP at different LaVO<sub>4</sub>:TPP molar ratios.

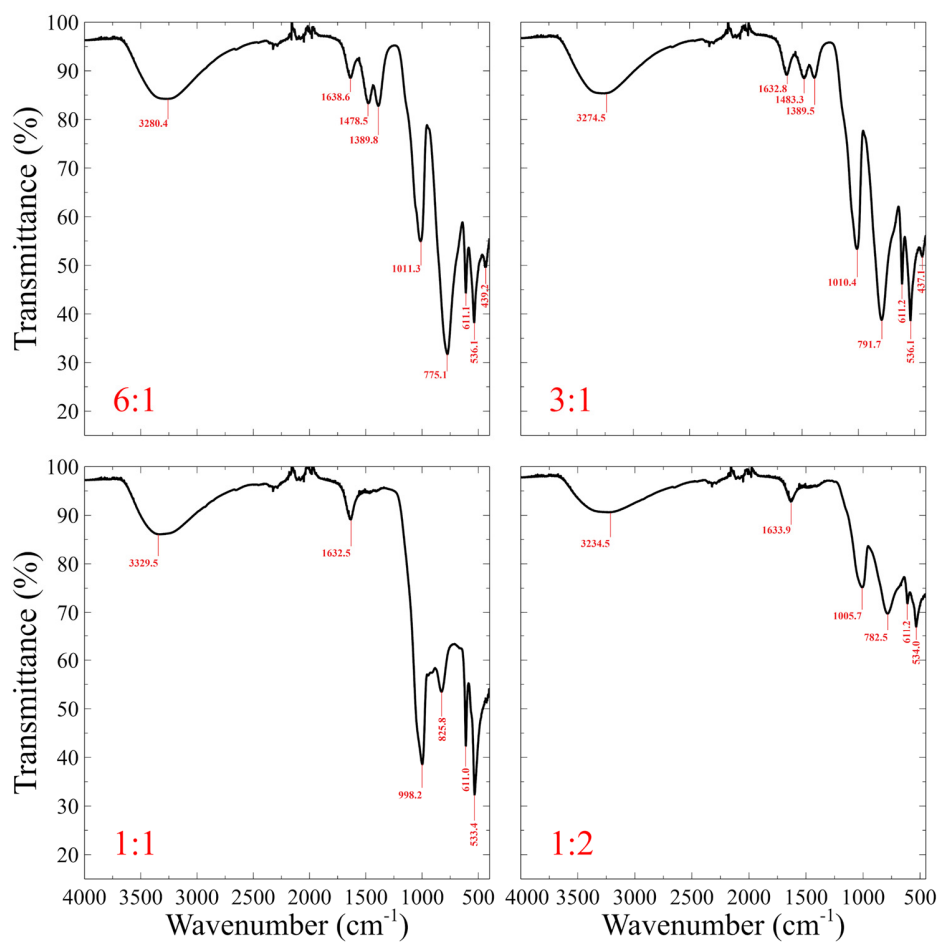

**Figure S7.** Characteristic phosphate vibration bands observed in LaVO<sub>4</sub> NPs modified with Hex at LaVO<sub>4</sub>:Hex molar ratios as low as 1:6. LaVO<sub>4</sub>:Hex molar ratios greater than 1:1 removed the vibration bands corresponding to carboxylate groups from precipitation of carbonate species. FTIR spectra of LaVO<sub>4</sub> NPs modified with Hex at different LaVO<sub>4</sub>:Hex molar ratios.

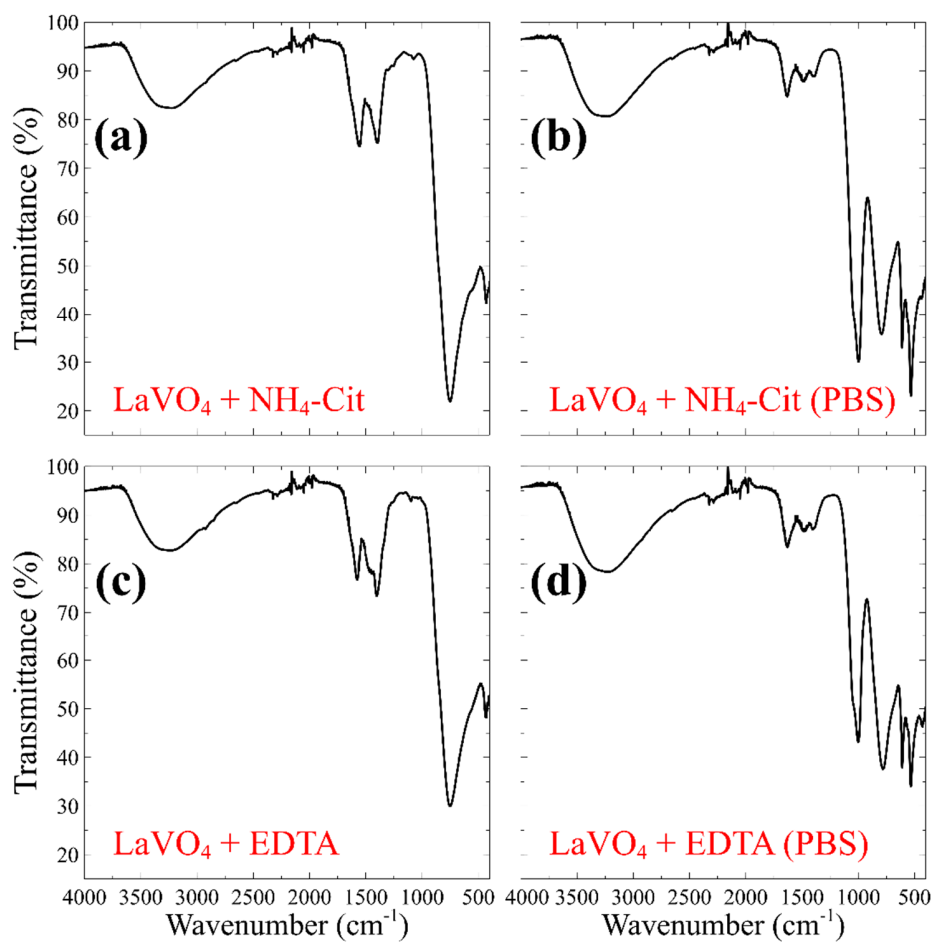

**Figure S8.** Presence of phosphate vibration bands after dispersing  $\text{LaVO}_4 + \text{NH}_4\text{-Cit}$  and  $\text{LaVO}_4 + \text{EDTA}$  in PBS. FTIR spectra of  $\text{LaVO}_4 + \text{NH}_4\text{-Cit}$  and  $\text{LaVO}_4 + \text{EDTA}$  NPs (a, c) before and (b, d) after dispersion in PBS (1X, pH = 7.4).

## References

- [1] “Nudat 2.” <https://www.nndc.bnl.gov/nudat2/> (accessed Jun. 12, 2020).
